# Supplementary figures and images for: 3D printed protein-based robotic structures actuated by molecular motor-based cortices
Source: Research Square preprint supplement (doi:10.21203/rs.3.rs-863696/v1), 2021-09-15

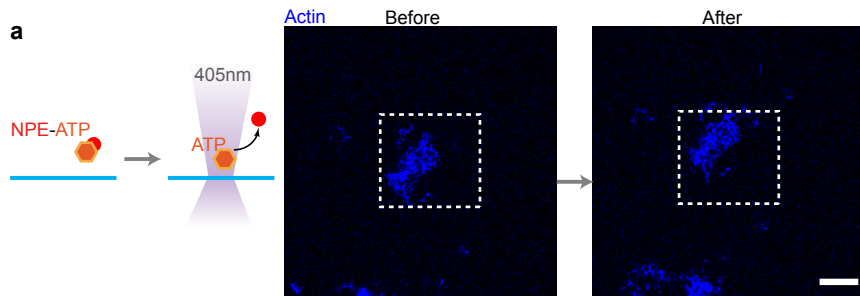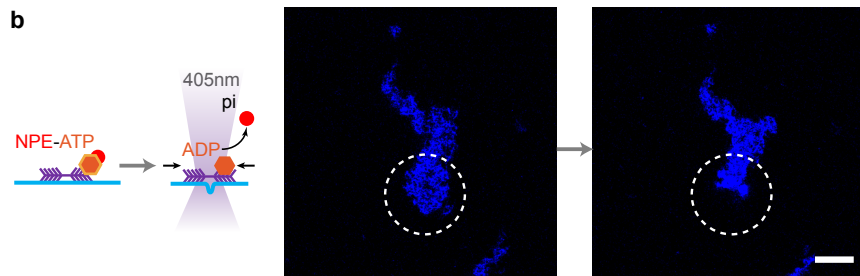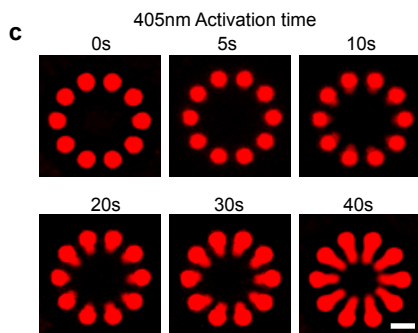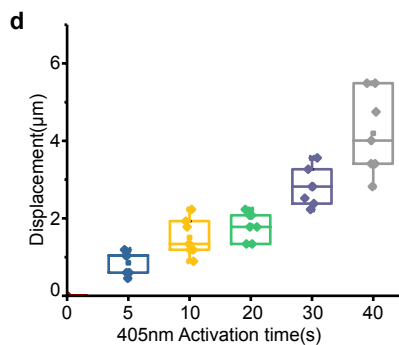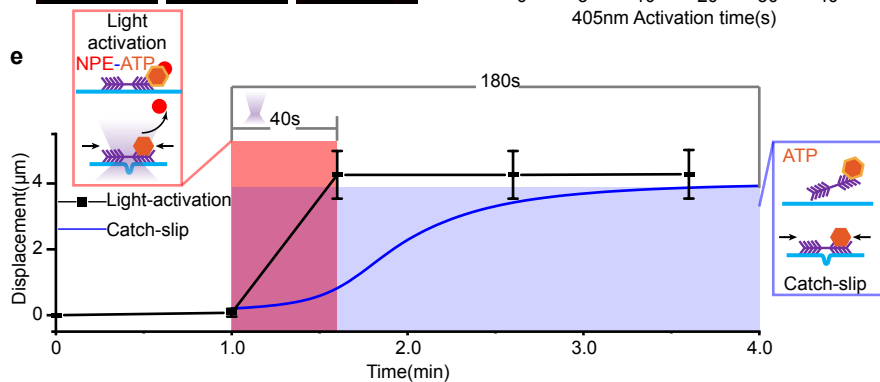

Supplement: Supplementary file 1 [file 4362f55dd308d334eab35516.pdf]
